# Supplementary material
Source: Frontiers journal article supplement (https://www.frontiersin.org/articles/379344)
Supplement: Presentation_1.pdf [file Presentation_1.pdf]

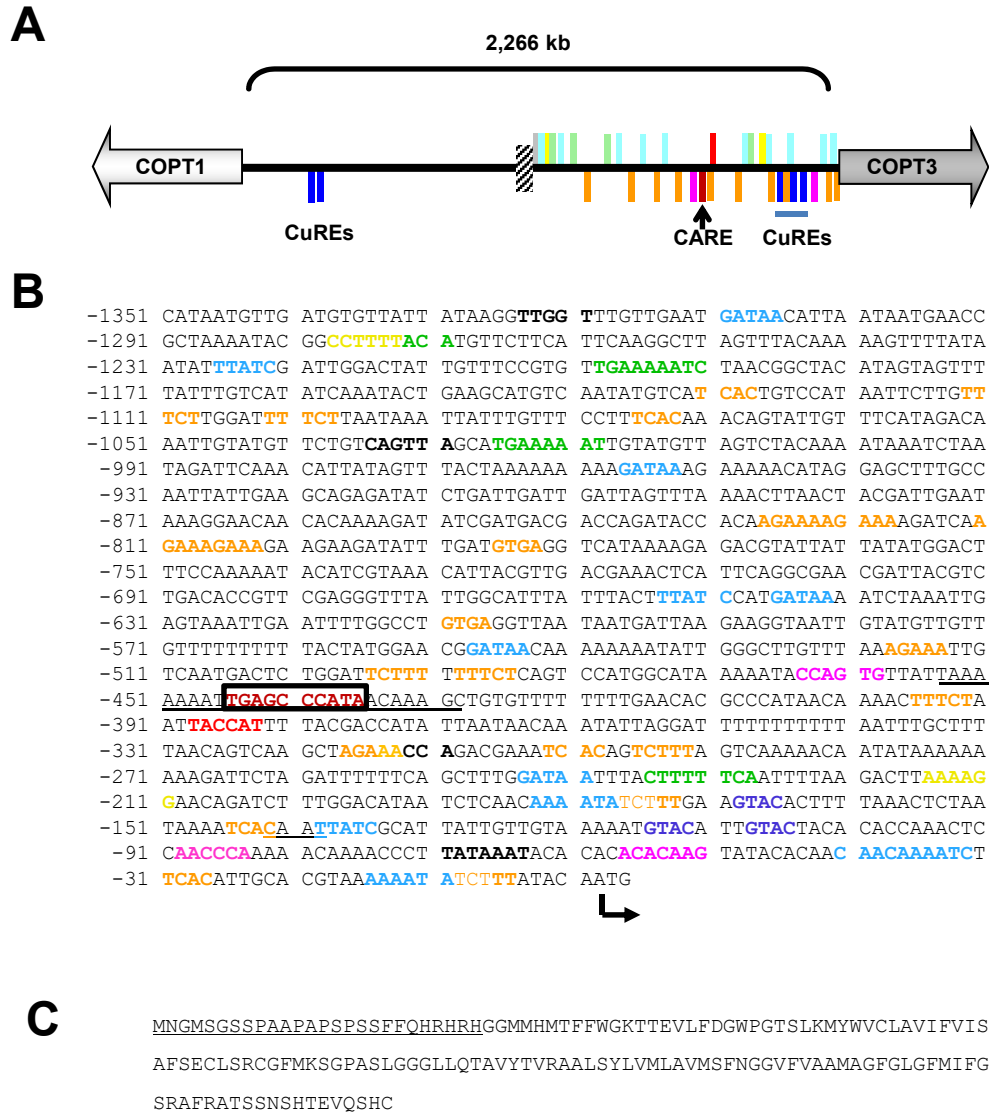

**Figure S1. Promoter region and protein sequence of the *COPT3* gene.** (A) Scheme of the common promoter region between *COPT1* and *COPT3* genes. Genes are indicated with arrows and the different promoter motifs are represented in colors as indicated in panel B. (B) Motifs in *COPT3* promoter region. Numbers represent the relative position respect to the first nucleotide of the start codon, which is +1 and indicated with an arrow. The most relevant motifs are represented with colors: Orange, pollen expression boxes; pink, embryo expression boxes; green, endosperm expression boxes; yellow, aleurone expression boxes; red, plastid expression box; light blue, light response boxes; dark blue, Cu response boxes. The TATA box is indicated in bold letters, the CAAT box is underlined, and the TCP binding motif is in a box. (C) *COPT3* protein sequence. The putative chloroplast target signal is underlined.

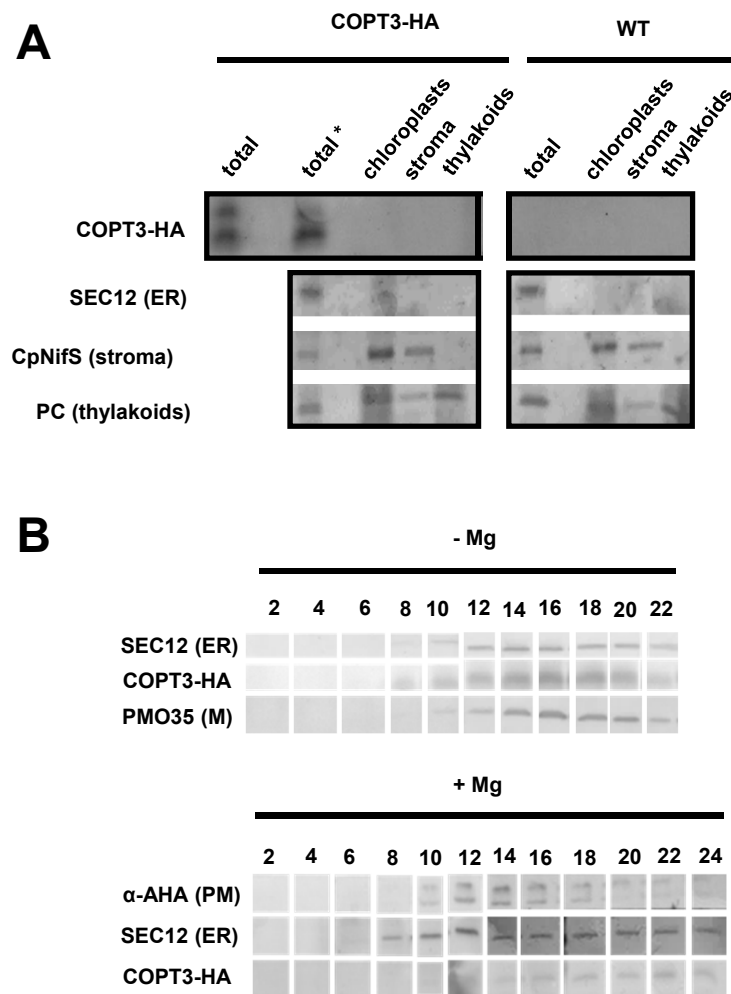

**Figure S2. COPT3 subcellular localization in Arabidopsis protein fractions.** (A) Extracts of total proteins, chloroplasts and stroma and thylakoids fractions from leaves of 3- to 4-week-old plants expressing the COPT3–HA fusion and grown in soil under long day conditions. The different fractions were electrophoresed, blotted, and immunodetected using antibodies against the HA epitope, the ER SEC12, the stroma CpNifS and the thylakoidal PC markers. Images from 1 preliminar experiment are shown. The asterisk indicated that the extract was kept in grinding buffer during the time of the whole isolation process. Whole blots are shown in panel C. (B) COPT3 subcellular localization by sucrose gradient density centrifugation. Protein extracts from the leaves of 4-week-old plants expressing the COPT3–HA fusion protein, and grown in soil under long day conditions, subjected to sucrose density gradient centrifugation with or without Mg. The different fractions were electrophoresed, blotted, and immunodetected using antibodies against the HA epitope, the ER SEC12, the plasma membrane  $\alpha$ -AHA, and the mitochondrial PMO35 markers. Images from 1 preliminar experiment are shown. Whole blots are shown in panel D. COPT3-HA, 18 KDa; SEC12, 43 KDa; CpNifS, 43 KDa; PC, 13 Kda;  $\alpha$ -AHA, 90-95 KDa; PMO35, 29 KDa.

**C**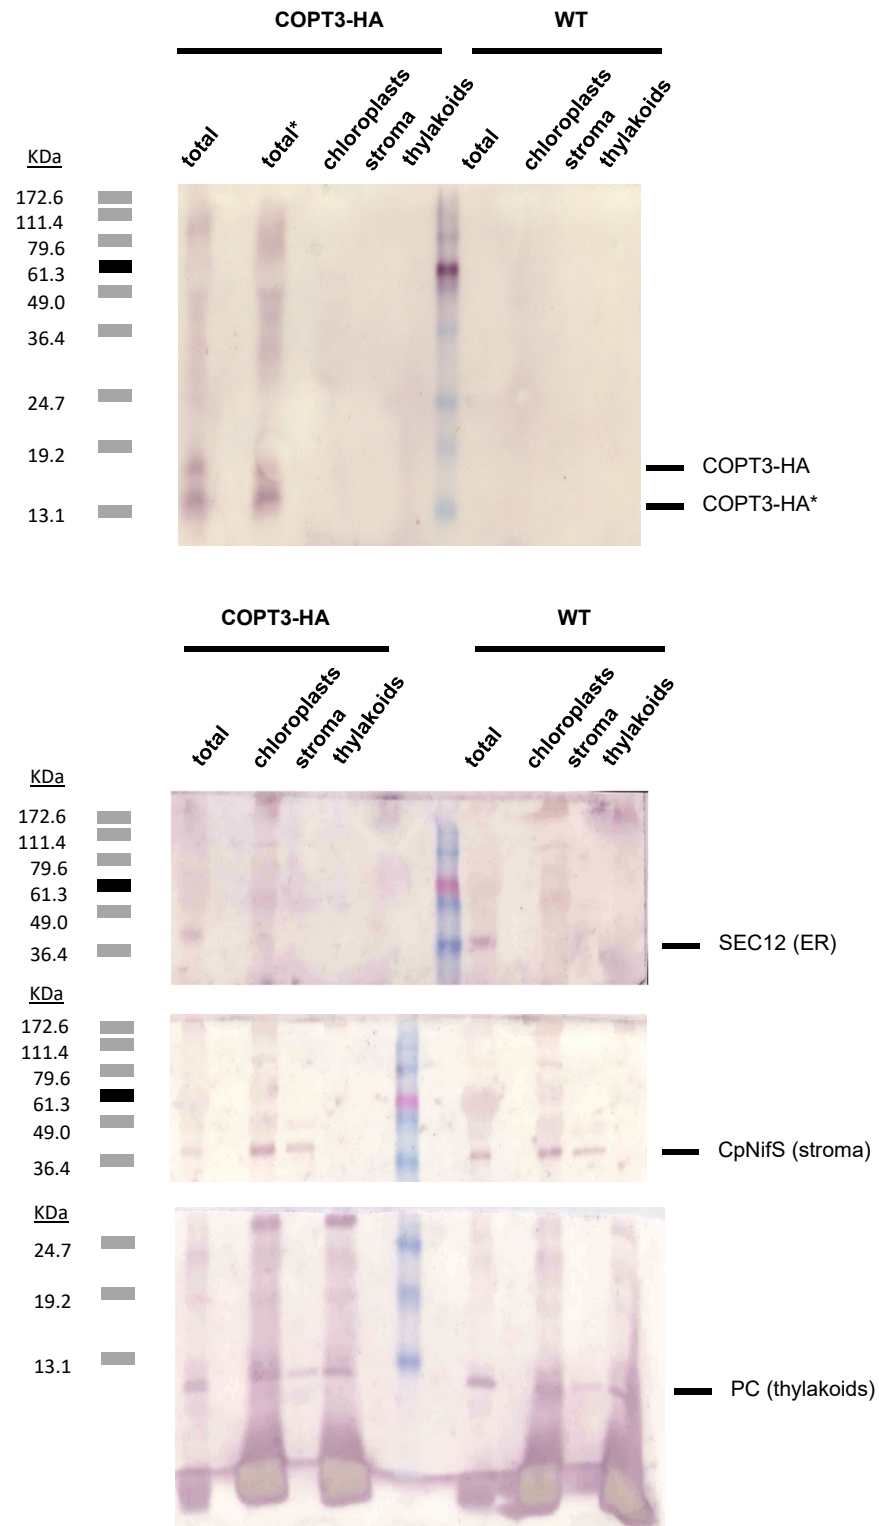

**Figure S2 (continuation). COPT3 subcellular localization in Arabidopsis protein fractions. (C) Whole blots from panel A. \*, putative degraded version of COPT3-HA**

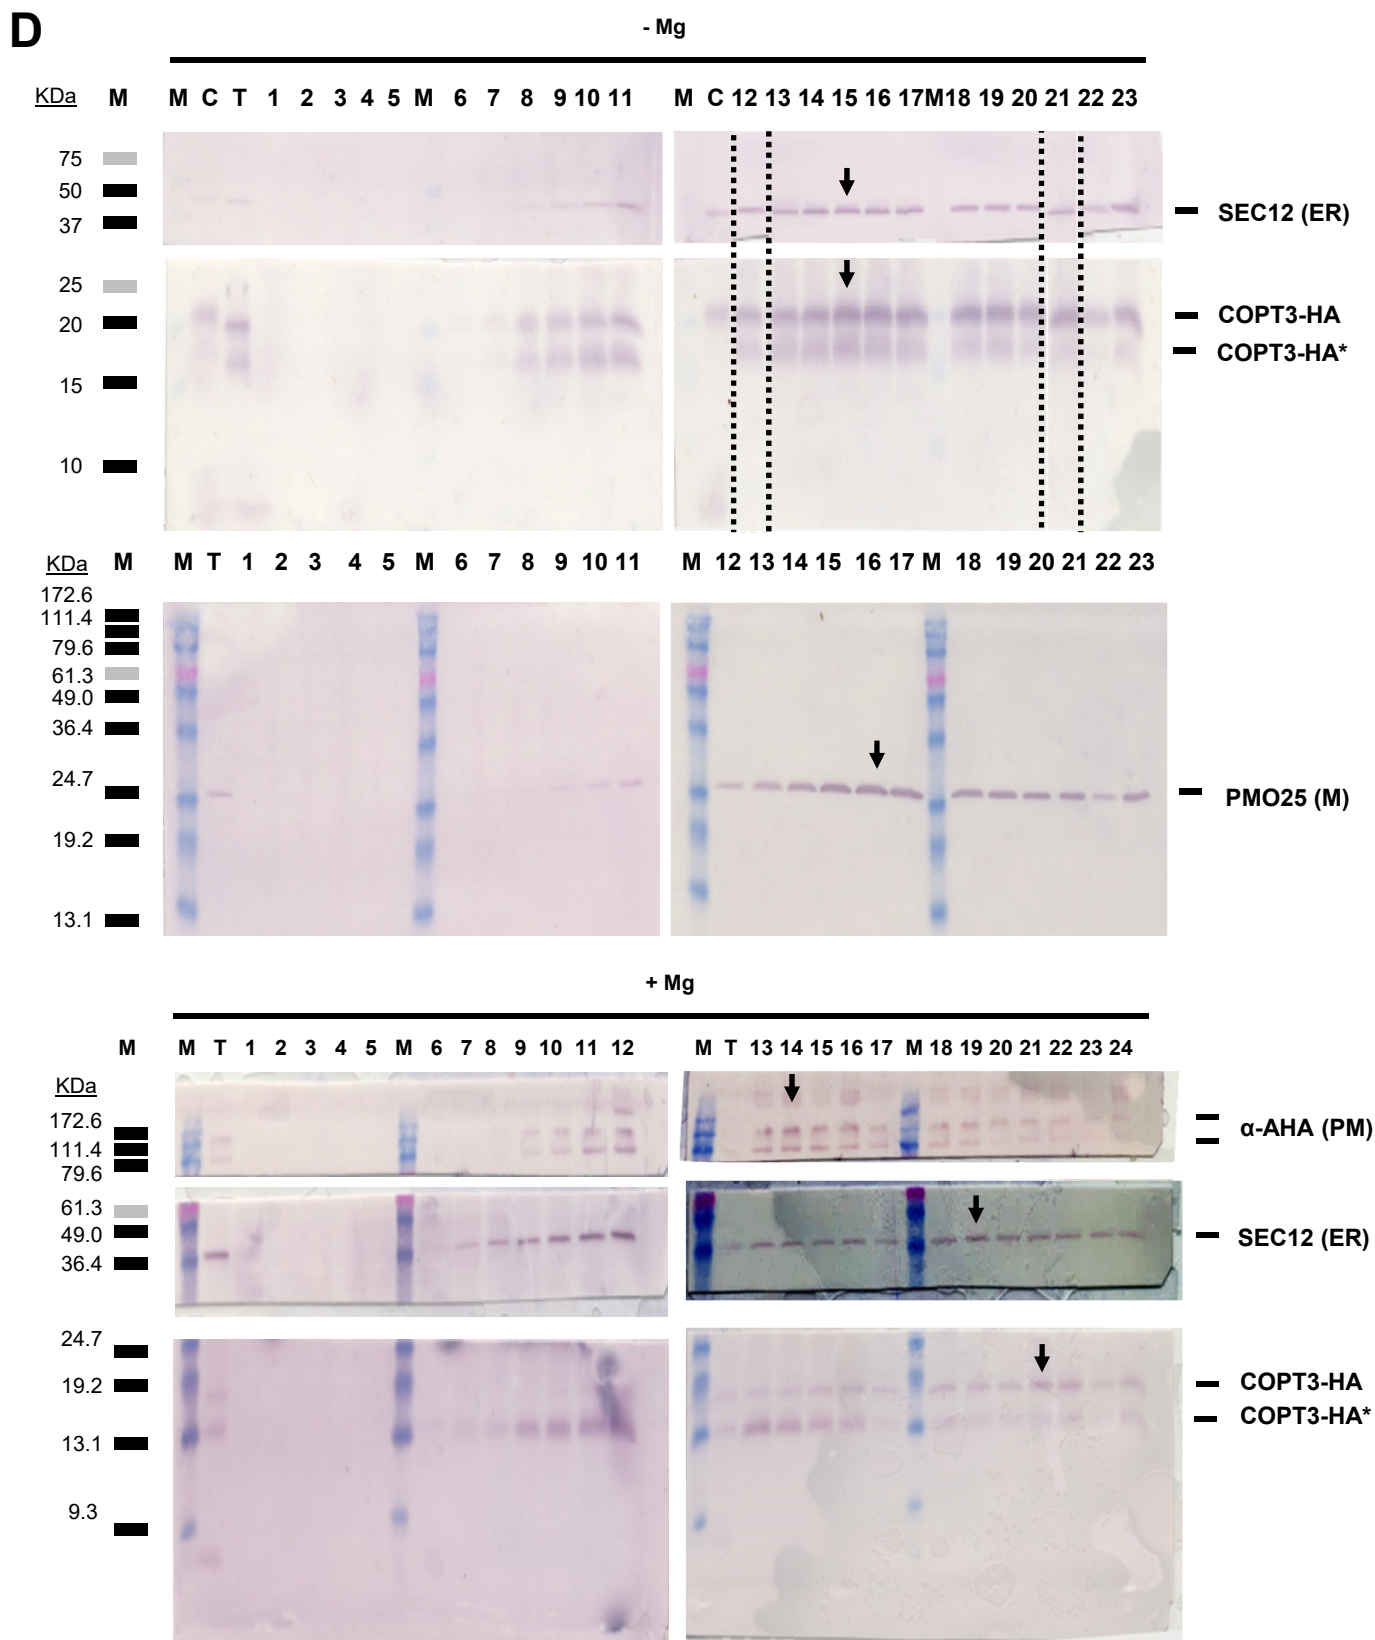

**Figure S2 (continuation). COPT3 subcellular localization in Arabidopsis protein fractions.**  
**(D)** Whole blots from panel B. \*, putative degraded version of COPT3-HA M, protein ladder. C, previously analyzed sample of total protein extract from plants expressing the COPT3-HA fusion. T, total protein extract from the plants expressing the COPT3-HA fusion before its fractionation. Arrows point to the more intense band in the fractionation for each immunodetected protein.

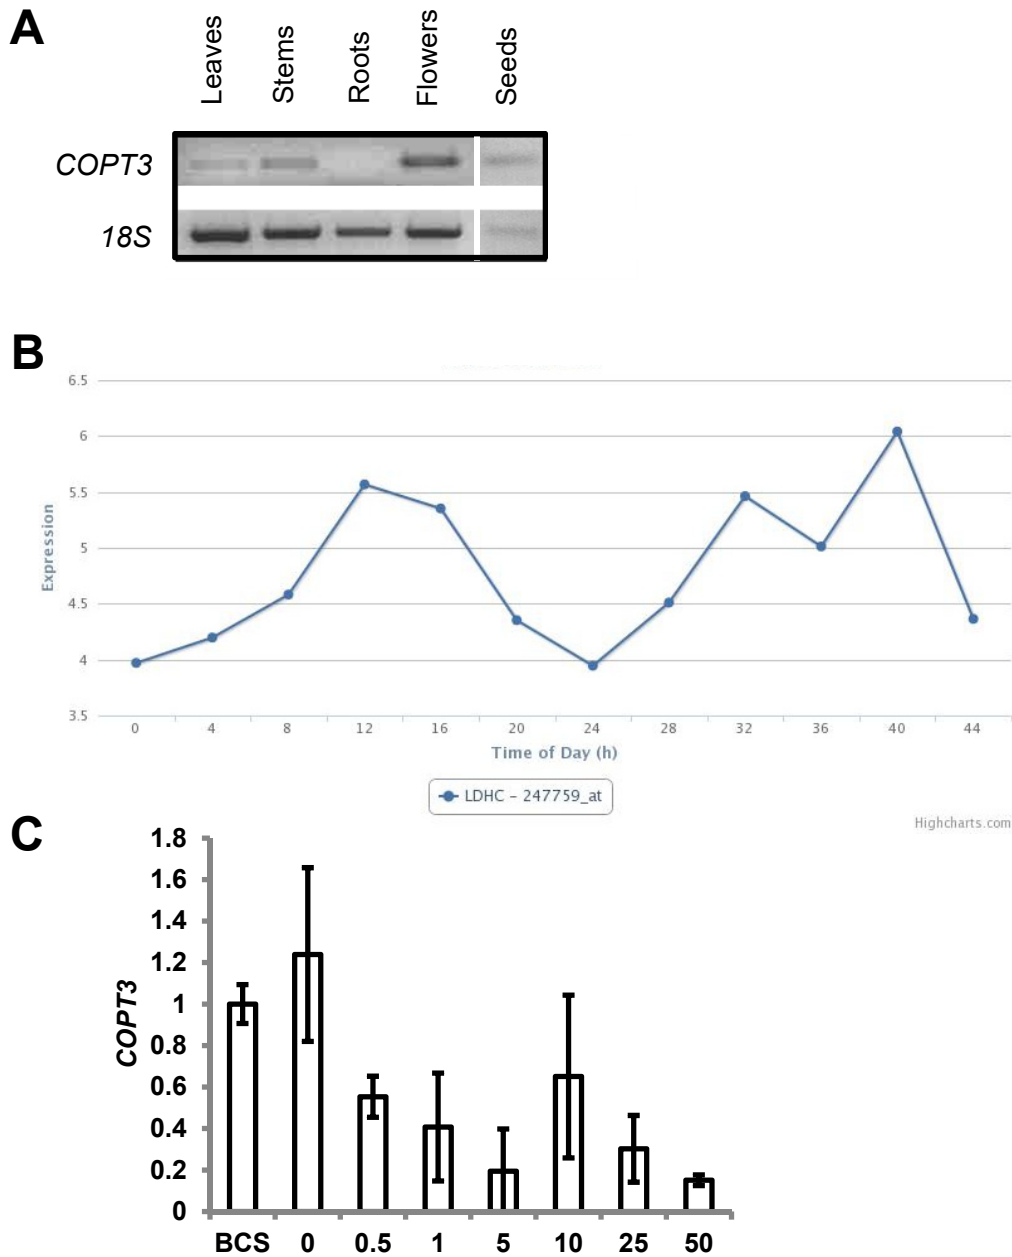

**Figure S3. *COPT3* expression pattern and regulation by Cu.** (A) *COPT3* expression in different tissues. Samples were taken from leaves, stem, roots, flowers and dried seeds of wild-type adult plants grown in soil under long day conditions. Total RNA was extracted and analyzed by RT-PCR with specific oligonucleotides for *COPT3*. The *18S* gene was used as loading control. Representative images from at least 2 biological samples are shown. (B) DIURNAL DataBase pattern of *COPT3* expression under 12 h light/ 12 h dark neutral photoperiod cycle (<http://diurnal.mocklerlab.org/>) (Mockler et al., 2007). (C) Expression of *COPT3* under different Cu status. 6-day-old wild-type seedlings grown in  $\frac{1}{2}$  MS medium (MS) and the same medium supplemented with 100  $\mu$ M BCS (BCS) or 0, 0.5, 1, 5, 10, 25 and 50  $\mu$ M  $\text{CuSO}_4$ . Samples were taken at 4 h under long day conditions. Total RNA was extracted and analyzed by RT-qPCR with specific oligonucleotides for *COPT3*. The relative expression in arbitrary units is represented. Values correspond to arithmetic means ( $2^{-\Delta\Delta\text{Ct}}$ )  $\pm$  standard deviation from 3 biological replicates ( $n=3$ ).

**A**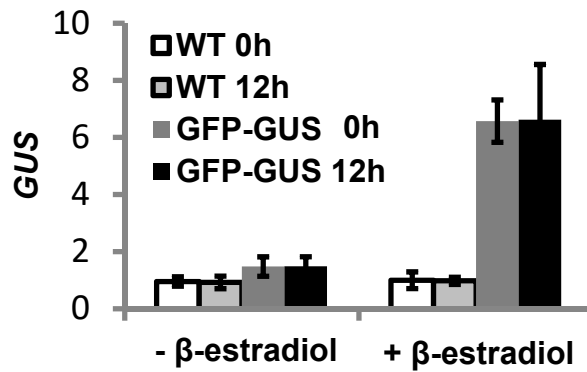**B**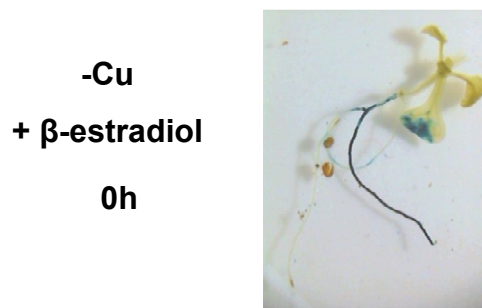**C**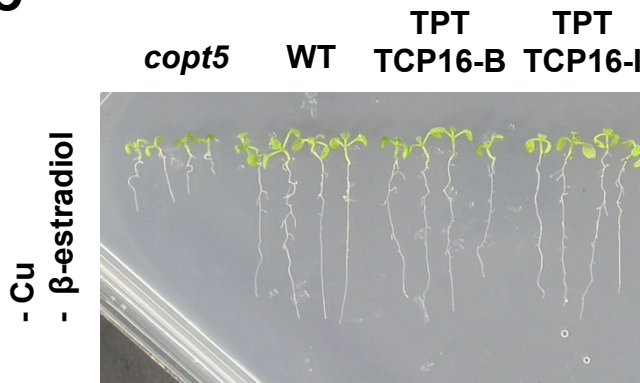

**Figure S4. Short-term kinetics of *GUS* expression by β-estradiol.** (A) 6-day-old wild-type (WT) and *ER8GWp:GUS-GFP* (GFP-GUS) seedlings grown in ½ MS medium supplemented with 100 μM BCS without (-β-estradiol) or with 2 μM β-estradiol (+β-estradiol). Samples were taken at 0 and 12 h of the 12 h light / 12 h dark cycle. Total RNA was extracted and analyzed by RT-qPCR with specific oligonucleotides for *GUS*. Values correspond to arithmetic means ( $2^{-\Delta\Delta C_t}$ )  $\pm$  standard deviation from 3 biological replicate with 3 technical replicates for each ( $n=3$ ). (B) Photograph of a representative 6-day-old *pER8GW:GUS-GFP* seedlings grown in ½ MS medium supplemented with 100 μM BCS (-Cu) and 2 μM β-estradiol (+β-estradiol), after GUS staining. A representative image from 10 seedlings is shown. (C) Photograph of representative 8-day-old *copt5*, wild-type (WT), TCP16-B and TCP16-I TPT seedlings grown in ½ MS medium supplemented with 100 μM BCS (-Cu) without (-β-estradiol). A representative image of at least 2 independent experiments is shown.

**A**

|                     | <i>COPT3p</i> |   |   |   |
|---------------------|---------------|---|---|---|
| probe*              | +             | + | + | + |
| probe               | -             | - | + | - |
| <i>COPT2p</i> probe | -             | - | - | + |
| MBP-TCP23           | -             | + | + | + |

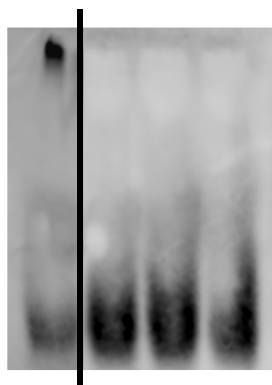**B**

|                     | <i>COPT5p</i> |   |   |   |
|---------------------|---------------|---|---|---|
| probe*              | +             | + | + | + |
| probe               | -             | - | + | - |
| <i>COPT2p</i> probe | -             | - | - | + |
| MBP-TCP23           | -             | + | + | + |

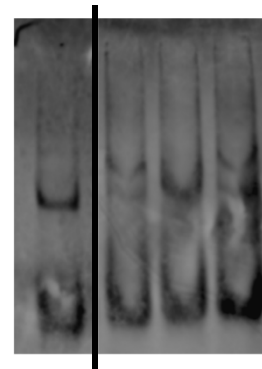

**Figure S5. EMSA binding assay between TCP23 protein and *COPTs* promoters.** Purified TCP23 protein was incubated with biotin-labeled (\*) DNA probe from *COPT3* promoter (**A**) and *COPT5* promoter (**B**), containing TCP box. Unlabeled probes were added as a competitor as indicated. Representative images of at least 2 independent experiments are shown.

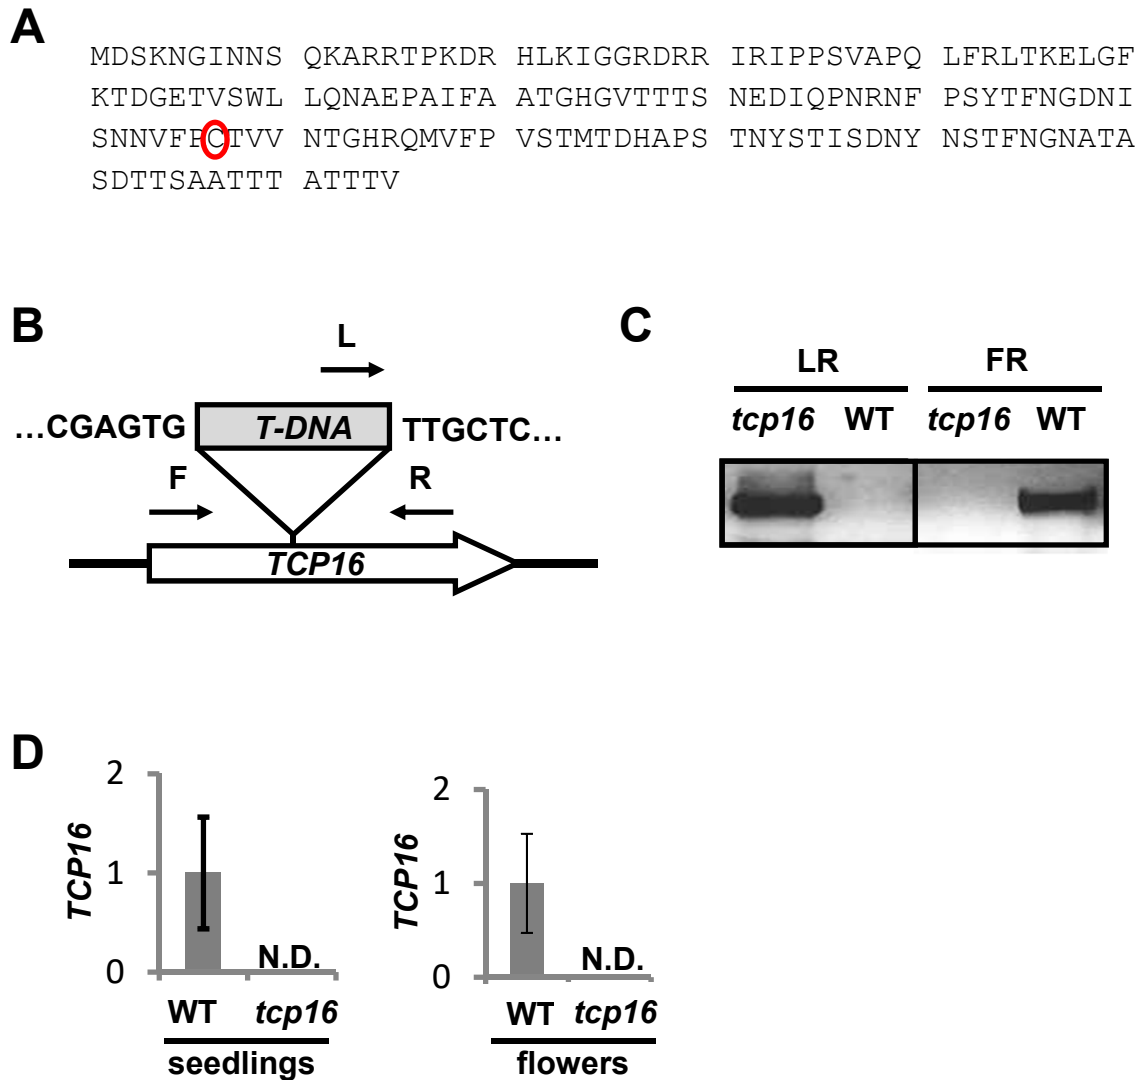

**Figure S6. Selection of the *tcp16* knockout line.** (A) Protein sequence. A putative Cu-binding Cys is indicated with a red circle. (B) Scheme showing the T-DNA insertion site in the knockout lines, and the position of the oligonucleotides used for PCR genotyping in panel B. (C) Genotyping of the knockout lines. Genomic DNA from the wild-type (WT) and the knockout seedlings was obtained and used for the PCR analysis. (D) 6-day-old wild-type (WT) and knockout seedlings grown in  $\frac{1}{2}$  MS medium supplemented with 100  $\mu$ M BCS and flowers from adult plants grown in liquid  $\frac{1}{2}$  MS medium supplemented with 100  $\mu$ M BCS. Samples were taken at 0 h (dark bars) of the 12 h light / 12 h dark cycle. Total RNA was extracted and analyzed by RT-qPCR with specific oligonucleotides for *TCP16*. The relative expression in arbitrary units is represented. Values correspond to arithmetic means ( $2^{-\Delta\Delta C_t}$ )  $\pm$  standard deviation from at least 2 biological replicates ( $n \geq 2$ ). N.D., not detectable.



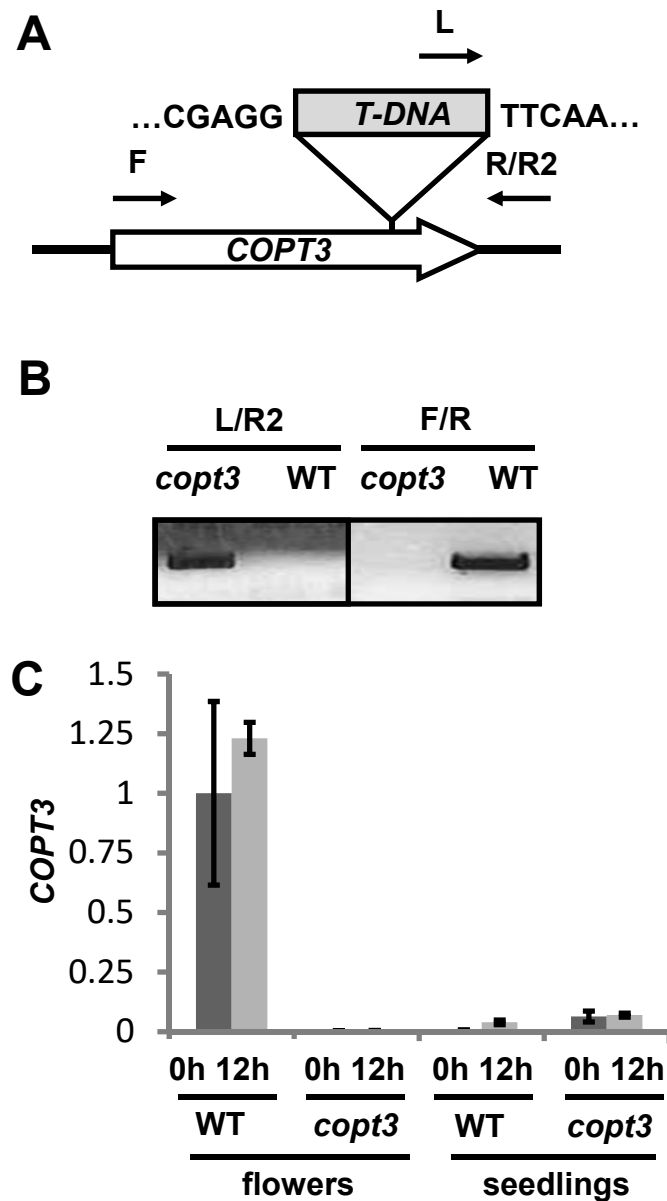

**Figure S7. Selection of the *copt3* knockout line.** (A) Scheme showing the T-DNA insertion site in the knockout lines, and the position of the oligonucleotides used for PCR genotyping in panel B. (B) Genotyping of the knockout lines. Genomic DNA from the wild-type (WT) and the knockout seedlings was obtained and used for the PCR analysis. (C) 6-day-old wild-type (WT) and knockout seedlings grown in  $\frac{1}{2}$  MS medium supplemented with 100  $\mu$ M BCS and flowers from plants grown in soil. Samples were taken at 0 h (dark bars) and 12 h (light bars) of the 12 h light/ 12 h dark cycle. Total RNA was extracted and analyzed by RT-qPCR with specific oligonucleotides for *COPT3*. The relative expression in arbitrary units is represented. Values correspond to arithmetic means ( $2^{-\Delta\Delta C_t}$ )  $\pm$  standard deviation from at least 3 biological replicates ( $n \geq 3$ ).

**Table SI. Transgenic lines used in this work.** The name of the line, the code and the reference where created are indicated.

| Line         | Code       | References                         |
|--------------|------------|------------------------------------|
| TPT TCP16-B  | 3.45150.1B | Coego <i>et al.</i> , 2014         |
| TPT TCP16-I  | 3.45150.1I | Coego <i>et al.</i> , 2014         |
| GFP-GUS      | -          | Coego <i>et al.</i> , 2014         |
| <i>copt5</i> | -          | García-Molina <i>et al.</i> , 2011 |
| TCP16 RNAi   | -          | Takeda <i>et al.</i> , 2005        |
| <i>tcp16</i> | N462818    | This work                          |
| <i>copt3</i> | GK633G06   | This work                          |
| COPT3-HA     | -          | Andrés-Colás <i>et al.</i> , 2010  |
| COPT3p-GUS   | -          | This work                          |

**Table SII. Cu homeostasis factors with TCP16 binding motifs.** Number of TCP16 CAREs in Cu homeostasis factors. TCP16 other versions, indicate the presence of different versions of the TCP16 CAREs as indicated. CuRE, number of GTAC motifs in the upstream 500 bp in both strains. Cu Reg, median log<sub>2</sub> ratio values at high (10 µM) vs low (MS) Cu levels obtained in microarray analysis (Andrés-Colás et al 2013).

| Factor            | MIPS code | TCP16<br>GTGGNCCC | TCP16<br>other versions | CuRE | Cu<br>Reg |
|-------------------|-----------|-------------------|-------------------------|------|-----------|
| COPT3             | AT5G59040 | 0                 | TTGAGCCCAT              | 3    | ---       |
| COPT5             | AT5G20650 | 0                 | GTAAGCCCAC              | 0    | -0.014    |
|                   |           |                   | GTGAGCCCAC              |      |           |
| HMA5              | AT1G63440 | 0                 | ATCGGCCCAC              | 0    | 0.826     |
| APX1              | AT1G07890 | 1                 | 0                       | 0    | -0.242    |
| Diamine oxidase   | AT1G31670 | 1                 | 0                       | 0    | ---       |
| SPL1              | AT2G47070 | 1                 | 0                       | 2    | -0.039    |
| SPL12             | AT3G60030 | 1                 | 0                       | 1    | 0.124     |
| Blue copper prot. | AT5G14345 | 1                 | 0                       |      | ---       |

**Table SIII. Oligonucleotides used for EMSAs.**

| Name    | Sequence                                               |
|---------|--------------------------------------------------------|
| COPT3 F | TAAAAAAATTGAGCCCATAACAAAGC-BIOTIN                      |
| COPT3 R | GCTTTGTTATGGGCTCAATTTTTTTA-BIOTIN                      |
| COPT5 F | GTGTTATTGTAAGCCCACTGGACTATAATGTGAGCCCACGAAGAAAC-BIOTIN |
| COPT5 R | GTTTCTTCGTGGGCTCACATTATAGTCCAGTGGGCTTACAATAACAC-BIOTIN |
| COPT2 F | TCACAATAAATACGAACCGATTCTCT                             |
| COPT2 R | AGAGAATCGGTTCGTATTTATTGTGA                             |

**Table SIV. Oligonucleotides used for regular PCRs.**

| Name     | Sequence                              |
|----------|---------------------------------------|
| COPT3 F  | AATACACACACACAAGTATACACAACAAC (C3 II) |
| COPT3 R  | CCTAATCATTATTTCAACGGGAAACAAGG (C3 II) |
| COPT3 R2 | AGAGAATTTAGATCGGAACGAACA (C3 I)       |
| GKATseq  | ATATTGACCATCATACTCATTGC (C3 I)        |
| GKAT-PCR | CCCATTTGGACGTGAATGTAGACAC             |
| TCP16 F  | CGAAAAATGGAATTAACAACAGC               |
| TCP16 R  | CAACCGTACAAGGGAAAACG                  |
| 18S F    | TGGGATATCCTGCCAGTAGTCAT               |
| 18S R    | CTGGATCCAATTACCAGACTCAA               |

**Table SV. Oligonucleotides used for real-time PCRs.**

| <b>Name</b> | <b>Sequence</b>            |
|-------------|----------------------------|
| TCP16 F     | ATGGTAATGCTACCGCCAGT       |
| TCP16 R     | CAAACGTGGTTGTGGCTGT        |
| COPT3 F     | TATTACAGACTGCGGTTTAC       |
| COPT3 R     | CGAAGACTCCTCCATTGAAC       |
| COPT3 F2    | AACAGTCACACCGAGGTTCA       |
| COPT3 R2    | TCAACGGGAAACAAGGAAAATAAA   |
| COPT1 F     | TTGCAATTTTCCTCTCCTCCCAA    |
| COPT1 R     | ATGATGGTCGAGGCATT          |
| COPT2 F     | CCTTTCGTATTTGGTGATGCT      |
| COPT2 R     | AAACACCTGCGTTAAAGGAC       |
| SDH1-2 F    | GGTGCCTTCGAGTTGCGTCG       |
| SDH1-2 R    | CCCTGCCGAAGGAGGAGCTG       |
| CAS F       | TGCTTCATCGACCATGGATA       |
| CAS R       | CGGCGTAAGATCACCTTTGT       |
| GUS F       | TTTGAAGCCGATGTCACGCCGT     |
| GUS R       | ACAAACGGTGATACGTACACT      |
| UBQ10 F     | TAATCCCTGATGAATAAGTGTTCTAC |
| UBQ10 R     | AAAACGAAGCGATGATAAAGAAG    |
